# Supplementary material for: Innovations in HbA1c analysis: finding the balance between speed and accuracy. An investigation of a potential new Secondary Reference Measurement Procedure for the IFCC
Source: publisher site journal article supplement (doi:10.1515/cclm-2023-1070), 2023-10-23
Supplement: Supplementary file 2 [file j_cclm-2023-1070_suppl_006.docx]

**A** (HbAS ) **B** (HbAC) **C** (HbAD)


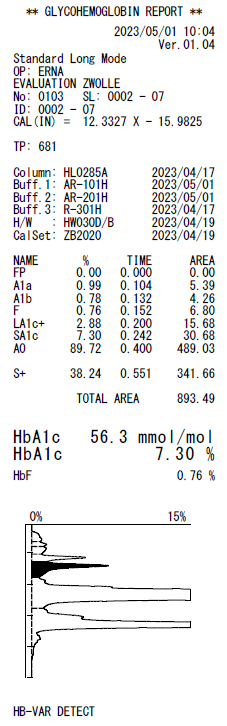

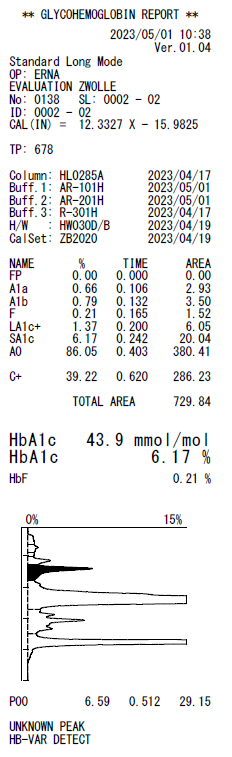

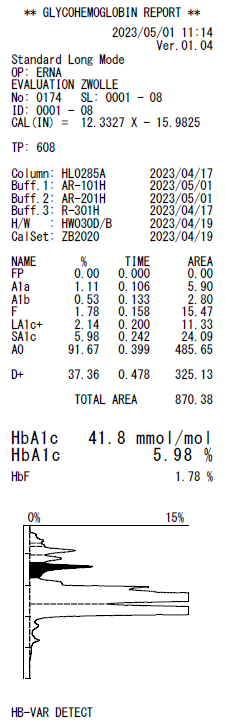


**D** (HbAE) **E** (HbF=21% ) **F (**A2=3.9%)


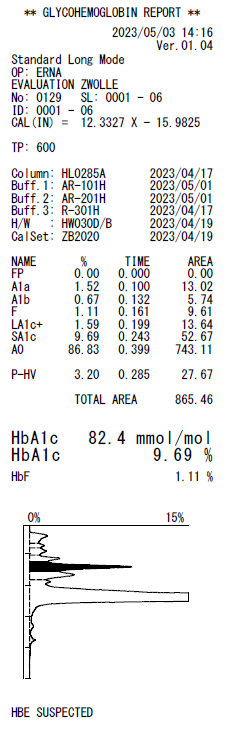

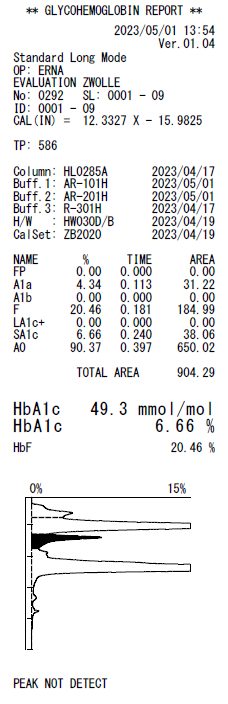

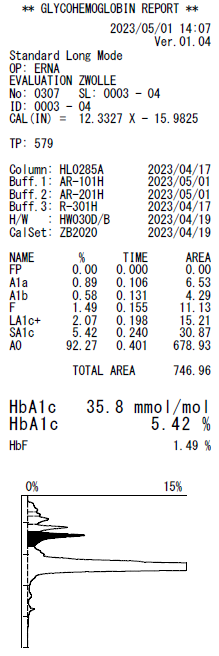


**Supplemental Figure 1B** Chromatograms of Tosoh GR01 Long Mode of different Hb-variants (**A**=HbAS, **B**=HbAC, **C**=HbAD, **D**=HbAE, **E**=HbF and **F**=A2).
